# Supplementary material
Source: PubMed Central journal article supplement (PMC3172388)
Supplement: NIHMS321319-supplement-1_si_001.pdf [file NIHMS321319-supplement-1_si_001.pdf]

# Supplementary Figure 1

Mitoxantrone

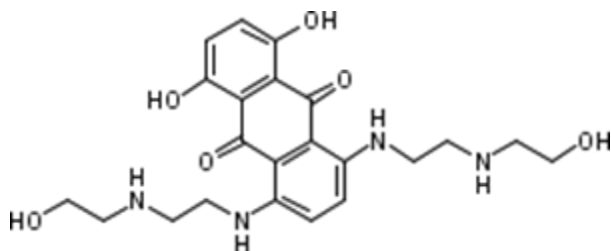

MW = 444.5 g/mol

cLogP = 0.36

Molecular volume = 398.67 Å<sup>3</sup>

Hoechst 33342

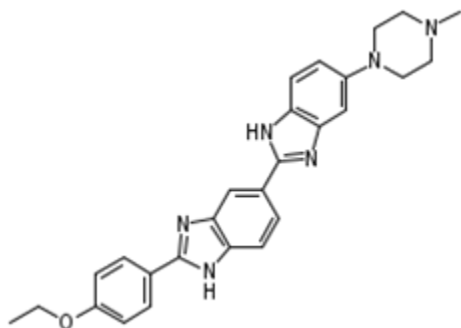

MW = 452.6 g/mol

cLogP = 5.53

Molecular volume = 417.34 Å<sup>3</sup>

7-Ethyl-10-hydroxycamptothecin (SN-38)

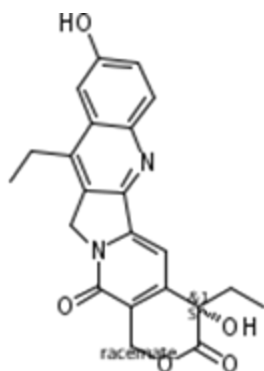

MW = 392.4 g/mol

cLogP = 2.67

Molecular volume = 338.79 Å<sup>3</sup>

Bodipy FL-prazosin

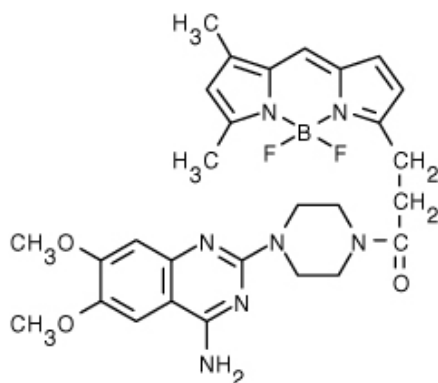

MW = 564.4 g/mol

cLogP = 5.56

Molecular volume = 519.99 Å<sup>3</sup>

The above parameters, except for cLogP of Bodipy FL-prazosin, were calculated using the web-based Molinspiration software. The clogP value of Bodipy FL-prazosin was taken from literature (Cygalkova et al., *J Pharmacol Exp Ther* 331: 1118-1125, 2009).
